# Supplementary material for: Early Warning of Cotton Bollworm Resistance Associated with Intensive Planting of Bt Cotton in China
Source: PubMed Central journal article supplement (PMC3153483; doi:10.1371/journal.pone.0022874), 2011-08-09
Supplement: pone.0022874.s001.pdf [file pone.0022874.s001.pdf]

**Table S1.** Responses to Cry1Ac activated toxin by *H. armigera* field populations sampled in 2010 from northern China (N) and northwestern China (NW)

| Population       | Region | n    | Slope±SE | LC <sub>50</sub> <sup>a</sup><br>(ng/cm <sup>2</sup> ) | 95% fiducial<br>limits of LC <sub>50</sub> | RR <sup>b</sup> |
|------------------|--------|------|----------|--------------------------------------------------------|--------------------------------------------|-----------------|
| SCD <sup>c</sup> |        | 408  | 2.2±0.2  | 28                                                     | 21 - 35                                    | 2.2             |
| Shawan (Sw)      | NW     | 1200 | 2.1±0.3  | 13                                                     | 7.1 - 21                                   | 1.0             |
| Shache (Sc)      | NW     | 528  | 1.9±0.2  | 24                                                     | 18 - 31                                    | 1.8             |
| Quzhou (Qz)      | N      | 960  | 2.6±0.3  | 26                                                     | 21 - 31                                    | 2.0             |
| Kaifeng (Kf)     | N      | 288  | 2.9±0.4  | 27                                                     | 21 - 33                                    | 2.1             |
| Huimin (Hm)      | N      | 1248 | 1.6±0.1  | 28                                                     | 13 - 47                                    | 2.2             |
| Anci (Ac)        | N      | 1536 | 1.5±0.1  | 32                                                     | 19 - 48                                    | 2.5             |
| Juye (Jy)        | N      | 840  | 2.2±0.2  | 38                                                     | 27 - 48                                    | 2.9             |
| Nanpi (Np)       | N      | 2040 | 1.5±0.1  | 41                                                     | 24 - 63                                    | 3.2             |
| Qianjiang (Qj)   | N      | 768  | 2.1±0.2  | 52                                                     | 34 - 73                                    | 4.0             |
| Gaoyang (Gy)     | N      | 336  | 2.0±0.2  | 62                                                     | 50 - 75                                    | 4.8             |
| Qiuxian (Qx)     | N      | 1224 | 2.1±0.3  | 62                                                     | 20 - 108                                   | 4.8             |
| Yancheng (Yc)    | N      | 1248 | 2.1±0.2  | 72                                                     | 12 - 152                                   | 5.5             |
| Nanyang (Ny)     | N      | 936  | 1.9±0.1  | 78                                                     | 58- 101                                    | 6.0             |
| Xiajin (Xj)      | N      | 1416 | 2.0±0.1  | 113                                                    | 78 - 150                                   | 8.7             |
| Anyang (Ay)      | N      | 1584 | 2.8±0.1  | 207                                                    | 160 - 252                                  | 16              |

<sup>a</sup> Concentration killing 50% of larvae tested

<sup>b</sup> Resistance ratio; LC<sub>50</sub> of a population divided by the LC<sub>50</sub> of the susceptible Shawan population

<sup>c</sup> Susceptible laboratory strain
