# Supplementary material for: Early Warning of Cotton Bollworm Resistance Associated with Intensive Planting of Bt Cotton in China
Source: PubMed Central journal article supplement (PMC3153483; doi:10.1371/journal.pone.0022874), 2011-08-09
Supplement: pone.0022874.s002.pdf [file pone.0022874.s002.pdf]

**Table S2.** Responses to Cry1Ac protoxin by *H. armigera* field populations sampled in 2010 from northern China (N) and northwestern China (NW)

| Population       | Region | n   | Slope±SE  | LC <sub>50</sub> <sup>a</sup><br>(ng/cm <sup>2</sup> ) | 95% fiducial<br>limits of LC <sub>50</sub> | RR <sup>b</sup> |
|------------------|--------|-----|-----------|--------------------------------------------------------|--------------------------------------------|-----------------|
| SCD <sup>c</sup> |        | 240 | 2.6 ± 0.4 | 33                                                     | 24 - 42                                    | 1.7             |
| Shawan (Sw)      | NW     | 240 | 2.1 ± 0.3 | 19                                                     | 5.5 - 34                                   | 1.0             |
| Shache (Sc)      | NW     | 288 | 2.1 ± 0.2 | 34                                                     | 28 - 42                                    | 1.8             |
| Quzhou (Qz)      | N      | 240 | 2.6 ± 0.4 | 41                                                     | 31 - 50                                    | 2.2             |
| Kaifeng (Kf)     | N      | 240 | 2.3 ± 0.3 | 42                                                     | 31 - 53                                    | 2.2             |
| Huimin (Hm)      | N      | 240 | 2.0 ± 0.3 | 29                                                     | 20 - 45                                    | 1.5             |
| Anci (Ac)        | N      | 288 | 2.1 ± 0.3 | 19                                                     | 13 - 24                                    | 1.0             |
| Juye (Jy)        | N      | 288 | 1.6 ± 0.2 | 31                                                     | 11 - 51                                    | 1.6             |
| Nanpi (Np)       | N      | 288 | 1.4 ± 0.2 | 81                                                     | 36 - 140                                   | 4.3             |
| Qianjiang (Qj)   | N      | 240 | 2.3 ± 0.3 | 80                                                     | 46-120                                     | 4.2             |
| Gaoyang (Gy)     | N      | 240 | 2.4 ± 0.3 | 94                                                     | 77 - 110                                   | 4.9             |
| Qiuxian (Qx)     | N      | 288 | 1.6 ± 0.2 | 48                                                     | 28 - 69                                    | 2.5             |
| Yancheng (Yc)    | N      | 192 | 1.4 ± 0.2 | 81                                                     | 49 - 120                                   | 4.3             |
| Nanyang (Ny)     | N      | 192 | 3.5 ± 0.6 | 140                                                    | 110 - 170                                  | 7.5             |
| Xiajin (Xj)      | N      | 288 | 2.2 ± 0.2 | 150                                                    | 98 - 220                                   | 7.7             |
| Anyang (Ay)      | N      | 288 | 2.6 ± 0.2 | 200                                                    | 140 - 280                                  | 10              |

<sup>a</sup> Concentration killing 50% of larvae tested

<sup>b</sup> Resistance ratio; LC<sub>50</sub> of a population divided by the LC<sub>50</sub> of the susceptible Shawan population

<sup>c</sup> Susceptible laboratory strain
