# Supplementary material for: Early Warning of Cotton Bollworm Resistance Associated with Intensive Planting of Bt Cotton in China
Source: PubMed Central journal article supplement (PMC3153483; doi:10.1371/journal.pone.0022874), 2011-08-09
Supplement: pone.0022874.s003.pdf [file pone.0022874.s003.pdf]

**Table S3.** Responses to Cry2Ab protoxin by *H. armigera* field populations sampled in 2010 from northern China (N) and northwestern China (NW)

| Population       | Region | n   | Slope±SE  | LC <sub>50</sub> <sup>a</sup><br>(ng/cm <sup>2</sup> ) | 95% fiducial<br>limits of LC <sub>50</sub> | RR <sup>b</sup> |
|------------------|--------|-----|-----------|--------------------------------------------------------|--------------------------------------------|-----------------|
| SCD <sup>c</sup> |        | 288 | 2.3±0.3   | 170                                                    | 83-240                                     | 3.3             |
| Shawan (Sw)      | NW     | 336 | 1.7 ± 0.2 | 51                                                     | 35 - 69                                    | 1.0             |
| Shache (Sc)      | NW     | 288 | 2.1 ± 0.3 | 59                                                     | 39 - 78                                    | 1.2             |
| Quzhou (Qz)      | N      | 288 | 2.1 ± 0.3 | 82                                                     | 59 - 110                                   | 1.6             |
| Kaifeng (Kf)     | N      | 336 | 1.6 ± 0.2 | 22                                                     | 14 - 30                                    | 0.43            |
| Huimin (Hm)      | N      | 336 | 2.0 ± 0.2 | 156                                                    | 110 - 200                                  | 3.1             |
| Anci (Ac)        | N      | 384 | 1.7 ± 0.2 | 170                                                    | 100 - 240                                  | 3.3             |
| Juye (Jy)        | N      | 384 | 2.2 ± 0.3 | 120                                                    | 85 - 151                                   | 2.3             |
| Nanpi (Np)       | N      | 288 | 2.3 ± 0.3 | 31                                                     | 23 - 39                                    | 0.61            |
| Qianjiang (Qj)   | N      | 288 | 2.0 ± 0.2 | 63                                                     | 39 - 89                                    | 1.2             |
| Qiuxian (Qx)     | N      | 336 | 1.7 ± 0.2 | 85                                                     | 60 - 110                                   | 1.7             |
| Yancheng (Yc)    | N      | 240 | 2.1 ± 0.3 | 23                                                     | 6.0 - 40                                   | 0.45            |
| Nanyang (Ny)     | N      | 336 | 1.4 ± 0.2 | 46                                                     | 27 - 66                                    | 0.9             |
| Xiajin (Xj)      | N      | 288 | 2.5 ± 0.3 | 86                                                     | 68 - 100                                   | 1.7             |
| Anyang (Ay)      | N      | 336 | 1.9 ± 0.2 | 130                                                    | 73 - 190                                   | 2.5             |

<sup>a</sup> Concentration killing 50% of larvae tested

<sup>b</sup> Resistance ratio; LC<sub>50</sub> of a population divided by the LC<sub>50</sub> of the susceptible Shawan population

<sup>c</sup> Susceptible laboratory strain
